# Supplementary material for: Polycomb- and Methylation-Independent Roles of EZH2 as a Transcription Activator
Source: PubMed Central journal article supplement — Cell Rep. Author manuscript; Available in PMC 2019 Jan 22. (PMC6342284; doi:10.1016/j.celrep.2018.11.035), 2018-12-04
Supplement: NIHMS1516651-supplement-1.pdf [file NIHMS1516651-supplement-1.pdf]

**Cell Reports, Volume 25**

**Supplemental Information**

**Polycomb- and Methylation-Independent Roles  
of EZH2 as a Transcription Activator**

**Jung Kim, Yongik Lee, Xiaodong Lu, Bing Song, Ka-Wing Fong, Qi Cao, Jonathan D. Licht, Jonathan C. Zhao, and Jindan Yu**

## Supplementary Information

### **Polycomb- and methylation-independent roles of EZH2 as a transcription activator**

Jung Kim<sup>1,#</sup>, Yongik Lee<sup>1,#</sup>, Xiaodong Lu<sup>1</sup>, Bing Song<sup>1</sup>, Ka-Wing Fong<sup>1</sup>, Qi Cao<sup>3</sup>, Jonathan Licht<sup>1,2,4</sup>, Jonathan C. Zhao<sup>1,2,\*</sup>, Jindan Yu<sup>1,2,5,\*</sup>

#### **Contents:**

Figure S1. EZH2 positively regulates AR signaling.

Figure S2. EZH2 and AR does not interact in LNCaP cells.

Figure S3. EZH2 directly induces AR gene transcription.

Figure S4. EZH2 activates AR through methylation-independent mechanisms.

Figure S5. Dual roles of EZH2 in prostate cancer.

Figure S6. Targeting of prostate cancer using combinatorial EPZ6438 and Enzalutamide treatment.

Figure S7. Combinatorial Enz and EPZ treatment inhibits AR signaling and xenograft tumor growth.

Table S1. AR promoter motif analysis.

Table S2. GO analysis of EZH2-H3K27ac genes.

Table S3. GO analysis of EZH2-H3K27me3 genes.

Table S4. Hallmark GO analysis of EPZ-6438 and Enz-regulated genes.

Table S5. Oligonucleotide sequences that were used in this study.

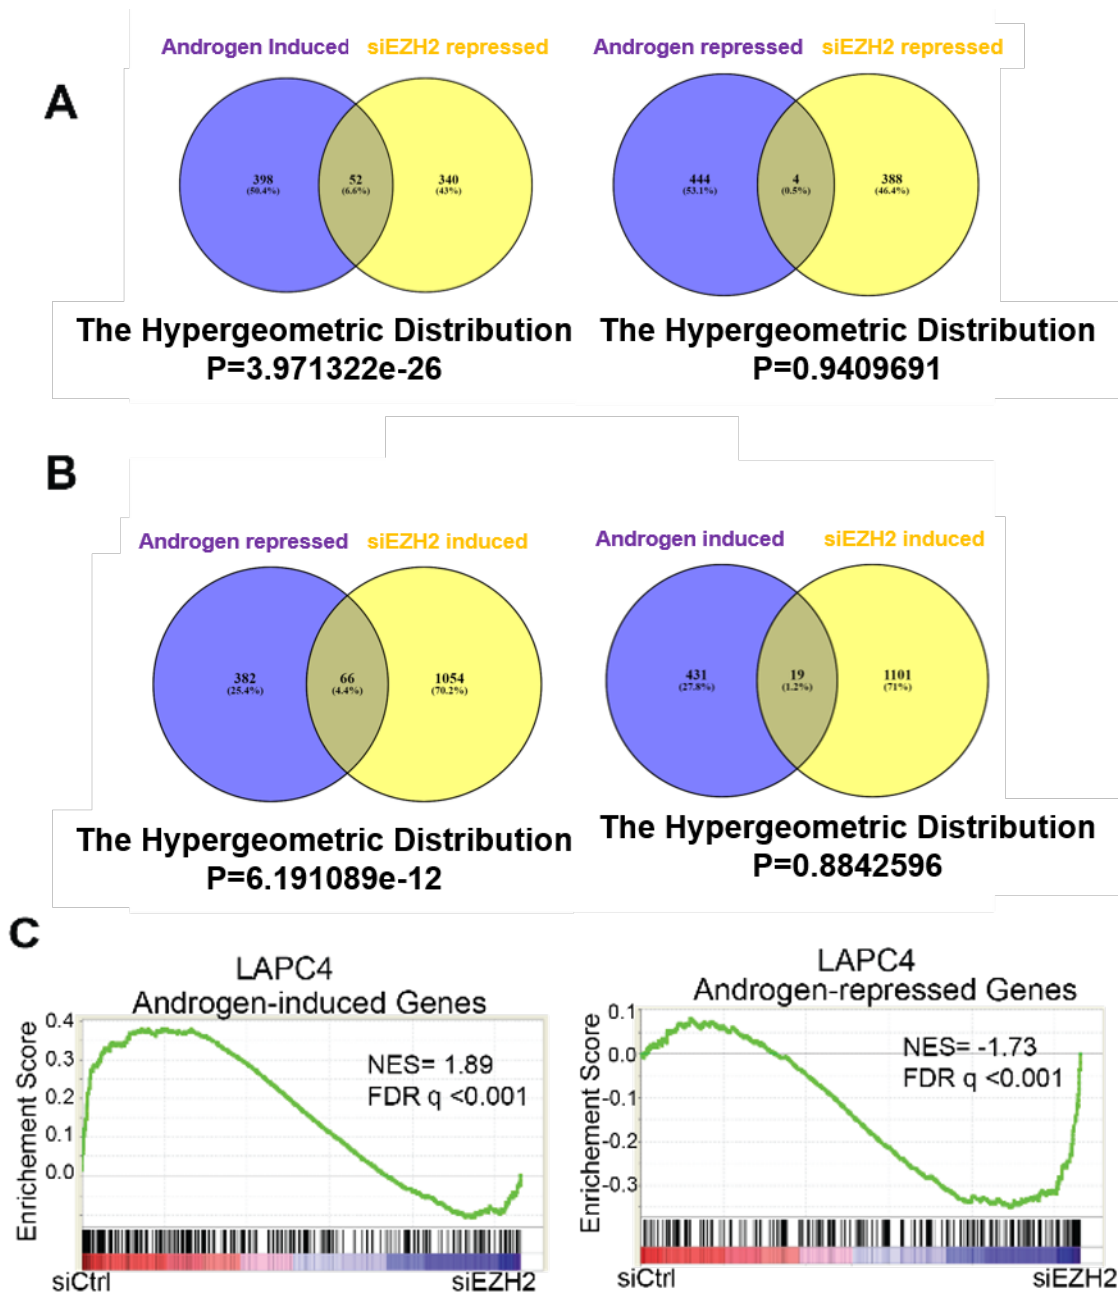

**Figure S1. EZH2 positively regulates AR signaling, related to Figure 1.** Venn diagram showing overlap between genes that were activated (A) or repressed (B) by EZH2 with those that are induced or repressed by androgen in LNCaP cells. (C) R1881 induced genes are enriched for downregulation upon EZH2 knockdown (FDR  $q < 0.001$ ), whereas R1881 repressed genes are enriched for restoration upon EZH2 knockdown (FDR  $q = 0.003$ ). GSEA was utilized to examine the expression of R1881-induced and -repressed gene sets in LAPC4 cells with control (siCtrl) or EZH2 knockdown (siEZH2), which were profiled by microarrays.

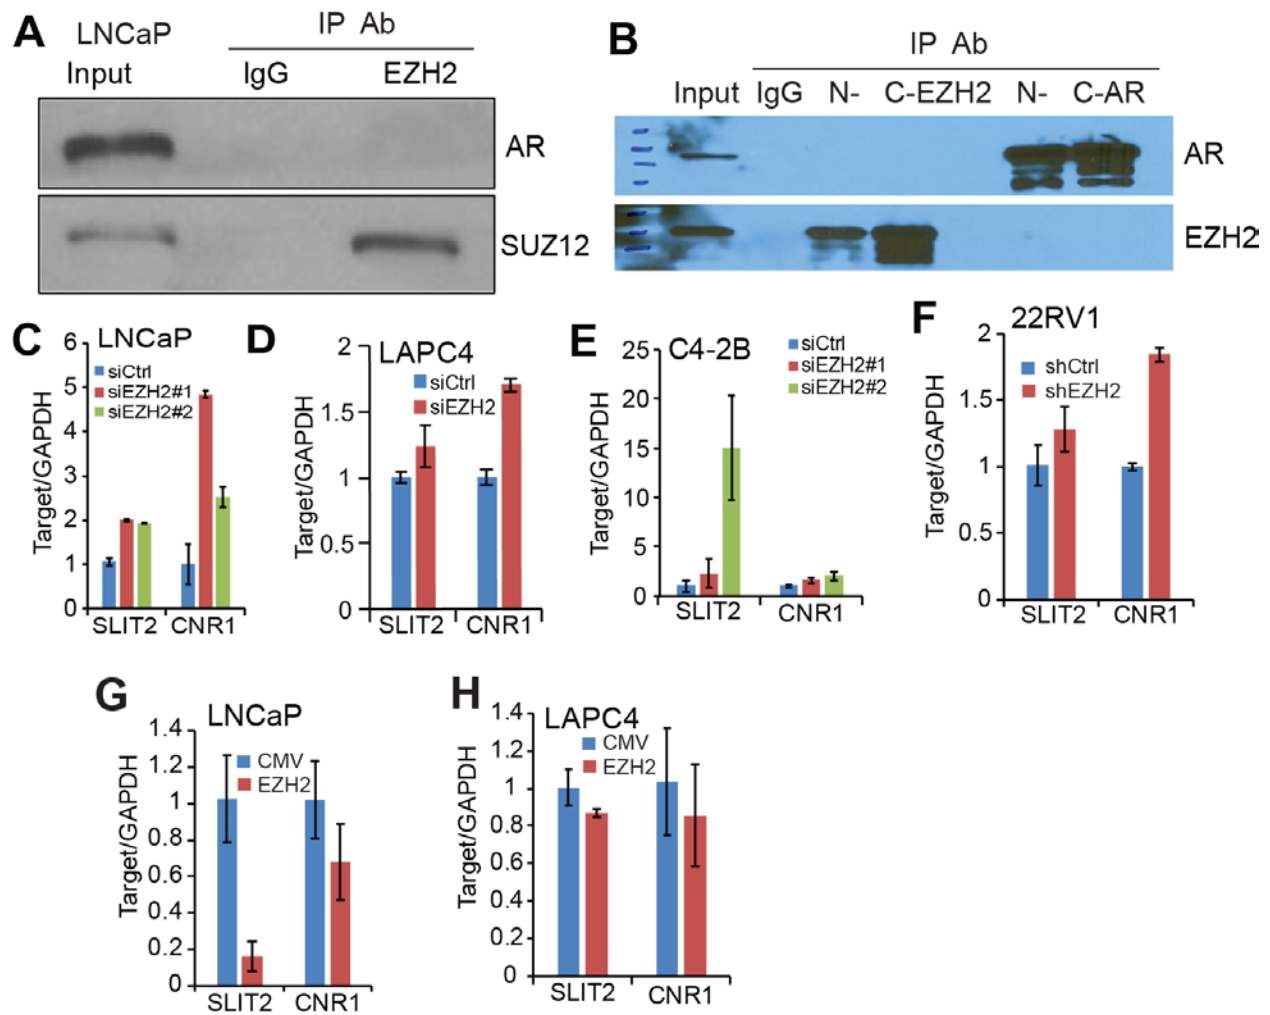

**Figure S2. EZH2 and AR does not interact in LNCaP cells, related to Figure 2.** (A) LNCaP cell lysate was pulled down with IgG or EZH2 antibody followed by immunoblotting with SUZ12, a positive control, and AR antibodies. (B) LNCaP total cell lysate was pulled with either N or C-terminal epitope EZH2 or AR antibodies followed by immunoblotting with AR and EZH2 antibodies. (C-D) QRT-PCR showing that EZH2 knockdown increases its well-known epigenetic targets, SLIT2 and CNR1, in LNCaP and LAPC4 cells. (E-F) QRT-PCR showing that EZH2 knockdown increased SLIT2 and CNR1 expression in C4-2B and 22RV1. (G-H) EZH2 overexpression decreased SLIT2 and CNR1 in LNCaP and LAPC4 cells.

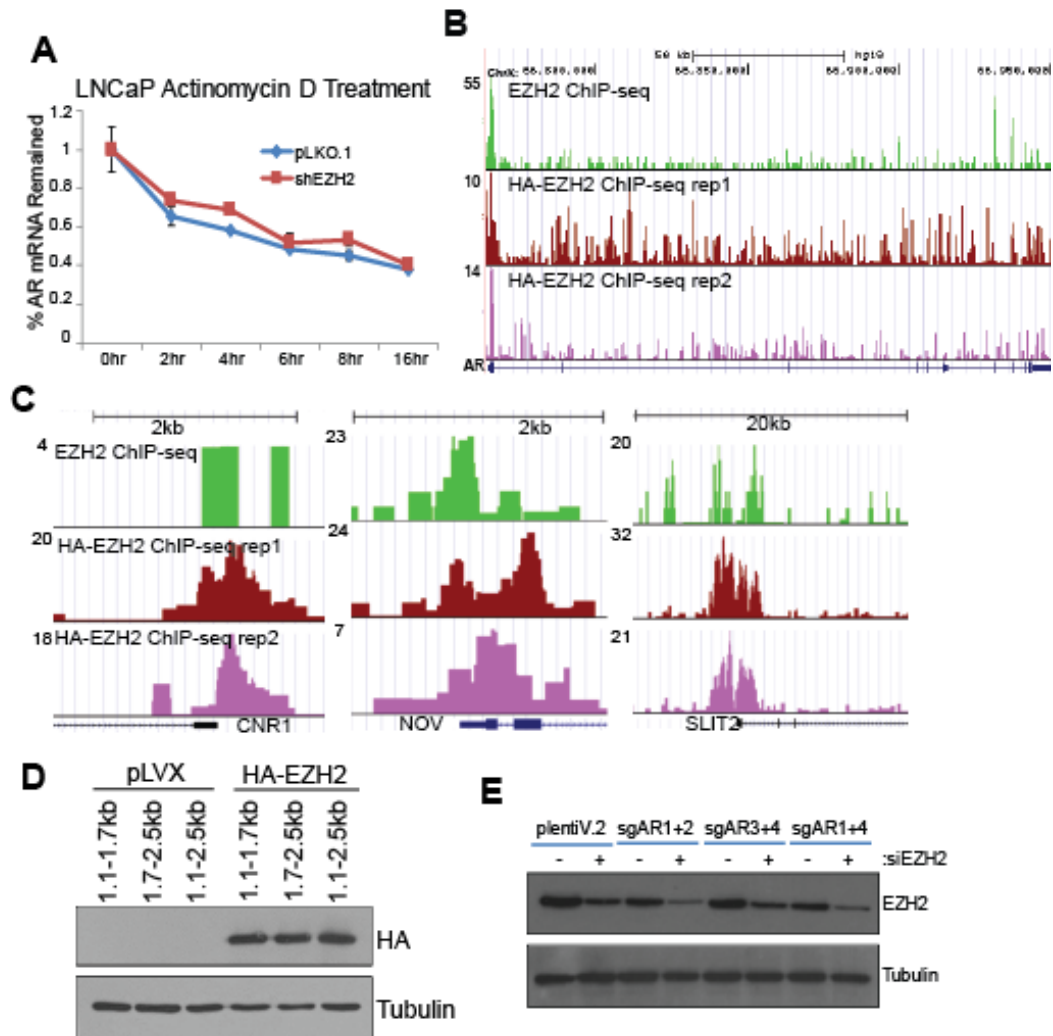

**Figure S3. EZH2 directly induces AR gene transcription, related to Figure 3.**

(A) EZH2 knockdown does not reduce AR mRNA stability. LNCaP pLKO.1 and EZH2 knockdown cells were plated and treated with actinomycin D for 2, 4, 6, 8, and 16 hrs prior to RNA isolation followed by qRT-PCR.

(B-C) EZH2 ChIP-seq was performed in LNCaP cells with antibody targeting endogenous EZH2 (top panel). HA-EZH2 ChIP-seq were performed using an anti-HA antibody in LNCaP cells with ectopic HA-EZH2 overexpression. Two biological replicates are shown (middle and bottom panel). EZH2 and HA-EZH2 ChIP-seq genome browser tracks for the entire AR gene (B) in LNCaP. Shown in (C) are EZH2 occupancy at the promoters of CNR1, NOV, and SLIT2 genes, which are previously reported targets of EZH2.

(D) HA-EZH2 overexpression confirmed by western blot analysis. 293T cells were transfected with either pLVX or HA-EZH2 along with different AR promoter constructs: 1.1-1.7kb, 1.7-2.5kb, or 1.1-2.5kb.

(E) EZH2 knockdown confirmed by western blot analysis. LNCaP cells were infected with lentiCRISPR/Cas9 containing pLENTI.V2 control, sgAR1+2, sgAR3+4, or sgAR1+4 for 48 hrs followed by EZH2 knockdown by transfection. EZH2 knockdown was validated using EZH2 immunoblot with tubulin loading controls.

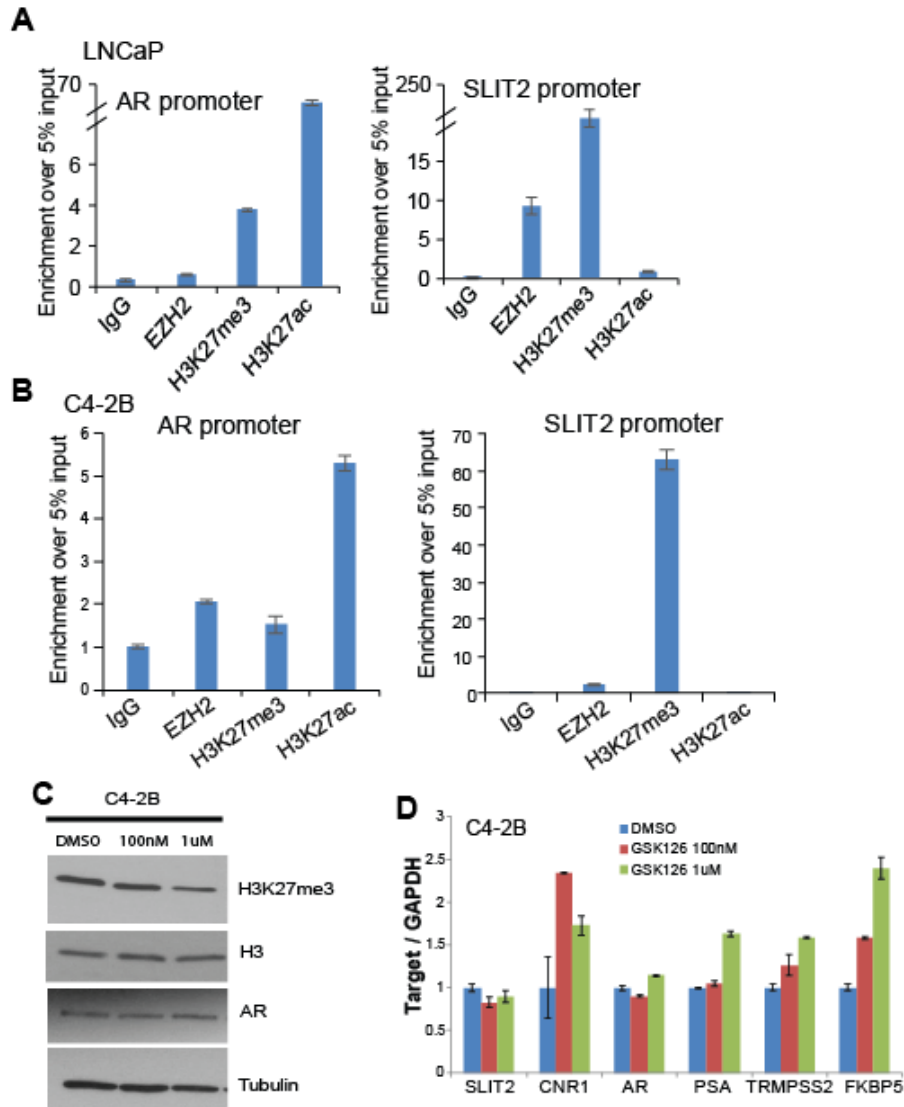

**Figure S4. EZH2 activates AR through methylation-independent mechanisms, related to Figure 4.**

(A-B) EZH2, H3K27me3, H3K27ac, and IgG ChIP was performed in LNCaP (A) and C4-2B (B) cells and then analyzed by qPCR for enrichment at the AR and SLIT2 promoters. Data shown are mean ( $\pm$ SEM) of technical replicates from one representative experiment of two.

(C-D) EZH2 methyltransferase inhibitors did not alter AR expression in C4-2B cells. C4-2B cells were treated with indicate doses of GSK126 for 72hrs and the cell lysates were subjected to (C) western blot analysis and (D) qRT-PCR. Data shown are mean ( $\pm$ SEM) of technical replicates from one representative experiment of three.

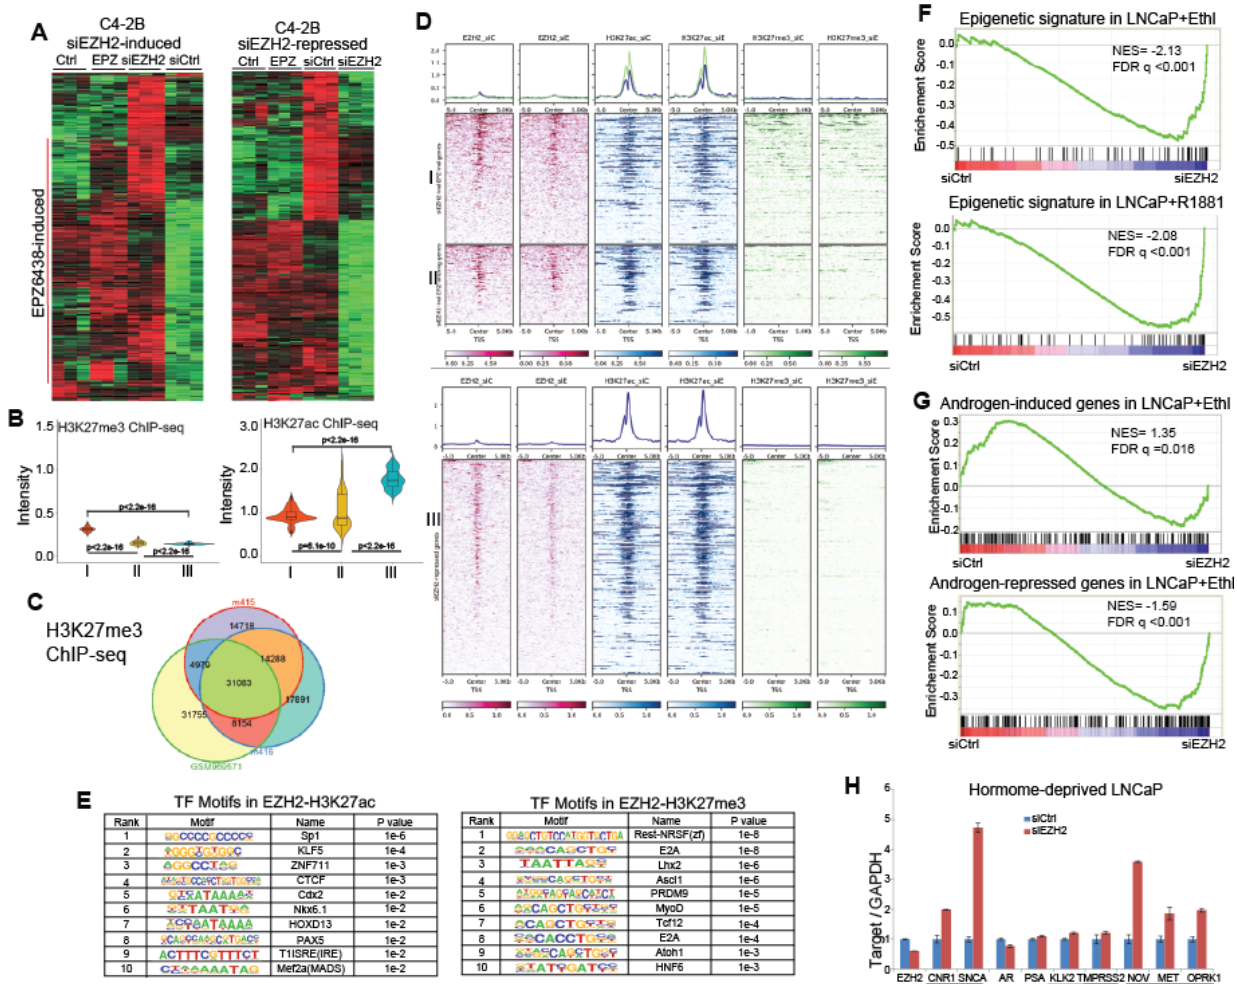

**Figure S5. Dual roles of EZH2 in prostate cancer, related to Figure 5.** (A) siEZH2-induced (left panel) or -repressed genes (right panel) were identified through analysis of microarray data profiling C4-2B cells with control (siCtrl) or EZH2 knockdown (siEZH2). Their expression levels in all samples including additional C4-2B cells treated with DMSO control (Ctrl) or EPZ6438 (EPZ) were clustered and visualized by heatmaps. (B) Boxplots showing EZH2, H3K27ac, and H3K27me3 ChIP-seq intensity for the 3 classes of EZH2-regulated genes identified in LNCaP as shown in Fig.5A. (C) Venn Diagram comparing H3K27me3 ChIP-seq performed in our lab (m415 and m416) with that presented in Xu et al. 2012 Science paper (GSM969574). (D) Average intensity plots and heatmaps showing EZH2, H3K27ac, and H3K27me3 ChIP-seq signals around the 3 classes of EZH2-regulated genes identified in Fig.5A. ChIP-seq was performed in LNCaP cells with control (siC) and EZH2 (siE) knockdown. (E) *De novo* motif analysis of EZH2-H3K27ac or EZH2-H3K27me3 genes that were identified in Fig.5D. (F) Epigenetic signature were obtained as genes (94 genes) that were up-regulated (adjusted p value <0.05) by EPZ-6438 as compared to control DMSO in LNCaP cells. GSEA showed that these genes are significantly enriched for up-regulation upon EZH2 knockdown (siEZH2) in both ethanol (Upper panel) and R1881-treated (Lower panel) LNCaP cells. G. Androgen-induced genes in LNCaP+Ethl and Androgen-repressed genes in LNCaP+Ethl. (H) Hormone-deprived LNCaP Target / GAPDH.

Androgen-induced and -repressed gene sets were obtained from microarray data of LNCaP cells as previously described (Zhao et al., 2012). GSEA showed that, in the absence of androgen (ethanol condition), androgen-induced genes (**Upper panel**) are only marginally enriched for down-regulation by siEZH2, whereas androgen-repressed genes (**Lower panel**) remained strongly enriched for up-regulation by siEZH2. **H.** LNCaP cells were hormone-starved for 3 days and subjected for control (siCtrl) or EZH2 (siEZH2) knockdown. The expression of target genes were assayed by qRT-PCR and normalized to GAPDH.



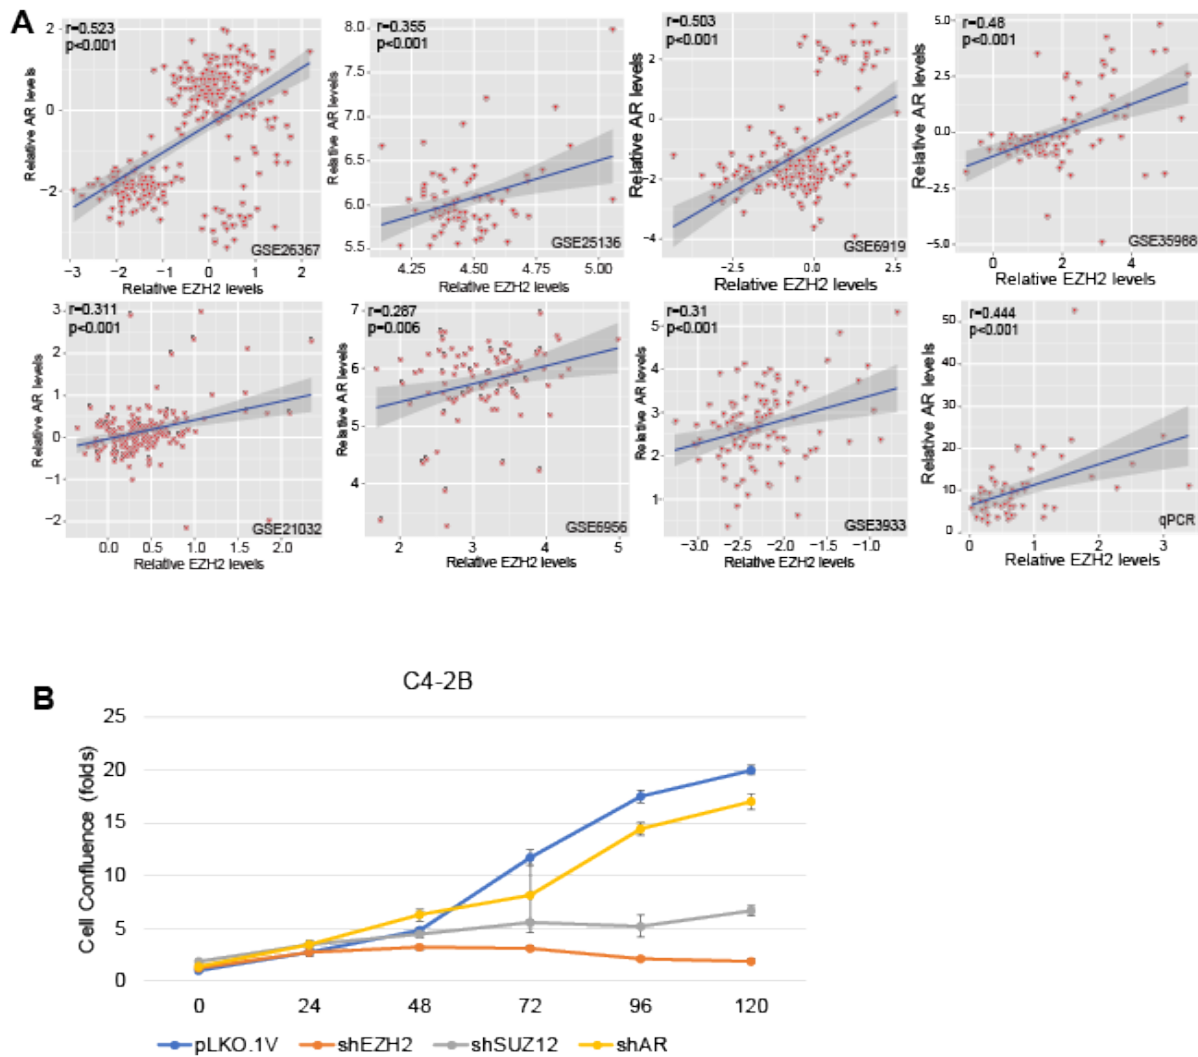

**Figure S6. Targeting of prostate cancer using combinatorial EPZ6438 and Enzalutamide treatment, related to Figure 6.**

(A) EZH2 and AR mRNA expression are positively correlated. Previously published prostate cancer gene expression data sets were downloaded from the GEO database (Ambs et al., 2008; Grasso et al., 2012; Lapointe et al., 2004; Sun and Goodison, 2009; Taylor et al.; Yu et al., 2004). The expression value of EZH2 and AR are retrieved and plotted by R ggplot2 package. Blue line represents best line of fit, and gray shades represent 95% confidence interval.

(B) C4-2B cells were infected with PLKO.1V, shEZH2, shSUZ12 or shAR and cell confluence were examined by Incucyte live imaging system.

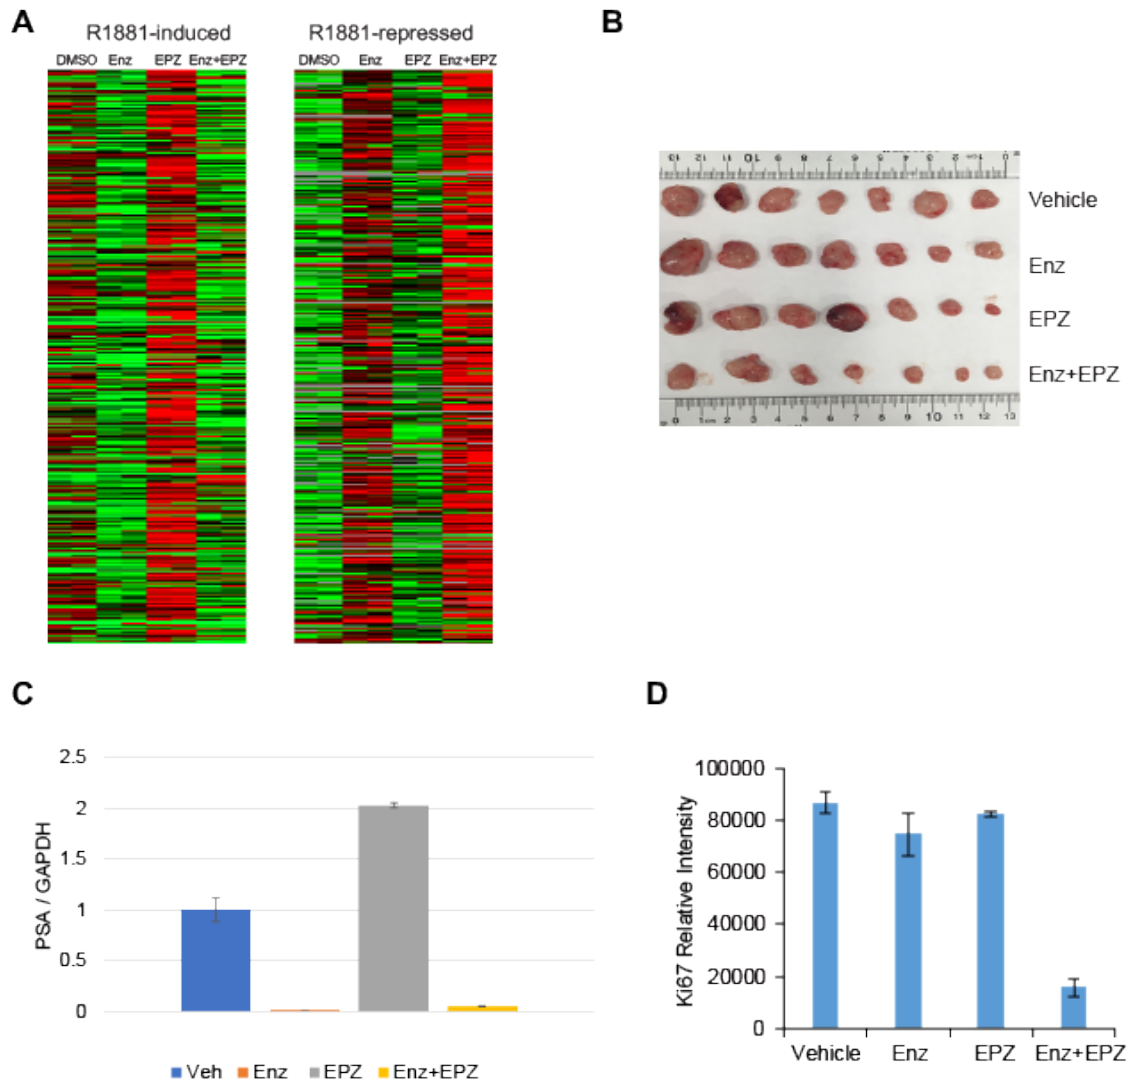

**Figure S7. Combinatorial Enz and EPZ treatment inhibits AR signaling and xenograft tumor growth, related to Figure 7.**

(A) C4-2B cells were treated with DMSO, EPZ-6438 (1 $\mu$ M, EPZ), enzalutamide (10 $\mu$ M, Enz), or both for 7 days and then subjected to RNA-seq. Experiments were done in biological triplicate. The expression (FPKM values) of androgen (R1881)-induced and androgen-repressed gene sets across all samples of varying treatments were clustered and visualized using heatmap.

(B) C4-2B ( $2 \times 10^6$ ) cells were implanted subcutaneously in surgically castrated NOD.SCID mice. Upon palpable tumor formation, the mice were randomized to receive indicated treatments (Vehicle control: 1% CMC-Na+1% tween30, 10mg/kg enzalutamide (once a day), 250mg/kg EPZ6438 (twice a day)) by oral gavage for three weeks. Xenograft tumors at the endpoint were dissected out and shown here.

(C) qPCR analysis of PSA from C4-2B xenograft tumors at the end points. Xenografts from seven mice from each treatment group were used for qPCR analysis.

(D) Quantification of Ki-67 IHC staining. Xenografts tissues from three mice of each group were randomly selected for Ki-67 analysis and quantification of Ki-67 was performed with Image J.

**Table S5. Oligonucleotide sequences that were used in this study.**

| Primer Name | Sequence                   | Application |
|-------------|----------------------------|-------------|
| GAPDH F1    | TGCACCACCAACTGCTTAGC       | qRT-PCR     |
| GAPDH R1    | GGCATGGACTGTGGTCATGAG      | qRT-PCR     |
| EZH2 F1     | TGCAGTTGCTTCAGTACCCATAAT   | qRT-PCR     |
| EZH2 R1     | ATCCCCGTGTACTTTCCCATCATAAT | qRT-PCR     |
| PSA F1      | ACGCTGGACAGGGGGCAAAG       | qRT-PCR     |
| PSA R1      | GGGCAGGGCACATGGTTCCT       | qRT-PCR     |
| TMPRSS2 F1  | CAGGAGTGTACGGGAATGTGATGGT  | qRT-PCR     |
| TMPRSS2 R1  | GATTAGCCGTCTGCCCTCATTGT    | qRT-PCR     |
| FKBP5 F1    | TTCATGTCTCCCCAGTTC         | qRT-PCR     |
| FKBP5 R1    | TTCTGGCTTTCACGTCTGTG       | qRT-PCR     |
| AR F1       | CAGTGGATGGGCTGAAAAAT       | qRT-PCR     |
| AR R1       | GGAGCTTGGTGAGCTGGTAG       | qRT-PCR     |
| ARV7 F1     | CAGGGATGACTCTGGGAGAA       | qRT-PCR     |
| ARV7 R1     | GCCCTCTAGAGCCCTCATT        | qRT-PCR     |
| SLIT2 F1    | CCGCAACACCGAGAGACT         | qRT-PCR     |
| SLIT2 R1    | CCTGGAATGCTCCTCTTTCA       | qRT-PCR     |
| CNR1 F1     | AGGAGTAAGGACCTGCGACA       | qRT-PCR     |
| CNR1 R1     | TCTTGACCGTGCTCTTGATG       | qRT-PCR     |
| AR -0.7 pF1 | GGGTGATTTTGCCTTTGAGA       | ChIP-PCR    |
| AR -0.7 pR1 | CTGCCTTTCTTCCTGTCTGG       | ChIP-PCR    |
| AR +0.5 pF1 | GCCCGAGTTTGCAGAGAG         | ChIP-PCR    |
| AR +0.5 pR1 | AGTCGCCTGGCTCCTAA          | ChIP-PCR    |
| AR +1.0 pF1 | TCCCGCAAGTTTCCTTCTC        | ChIP-PCR    |
| AR +1.0 pR1 | GGCTGAATCTTCCACCTACTT      | ChIP-PCR    |
| AR +1.4 pF1 | CACAGGCTACCTGGTCCT         | ChIP-PCR    |
| AR +1.4 pR1 | TCTGGGACGCAACCTCT          | ChIP-PCR    |
| AR +1.7 pF1 | CCACTTCTCCAAGGACAATTA      | ChIP-PCR    |
| AR +1.7 pR1 | CTGGACTCAGATGCTCCAAC       | ChIP-PCR    |
| AR +2.1 pF1 | AAGGGCTAGAAGGCGAGA         | ChIP-PCR    |
| AR +2.1 pR1 | GACTTGTAGAGAGACAGGGTAGA    | ChIP-PCR    |
| AR +2.6 pF1 | TTCTGGGTCACCCTCAGC         | ChIP-PCR    |
| AR +2.6 pR1 | CACCACCACACCGGT            | ChIP-PCR    |
| AR +3.3 pF1 | GTAGTTGCTTGGGTTCGGTTT      | ChIP-PCR    |
| AR +3.3 pR1 | CTGATGCAAACCTGAAGTAGGG     | ChIP-PCR    |
| SLIT2 pF1   | CCAAGTTCATCCTTGGGAGA       | ChIP-PCR    |

|                          |                                                                                          |             |
|--------------------------|------------------------------------------------------------------------------------------|-------------|
| SLIT2 pR1                | AAGGCAGTAGAGCCCCTCA                                                                      | ChIP-PCR    |
| KIAA0066 pF1             | CTAGGAGGGTGGAGGTAGGG                                                                     | ChIP-PCR    |
| KIAA0066 pR1             | GCCCCAAACAGGAGTAATGA                                                                     | ChIP-PCR    |
| pRetroX-Tight-Pur-Luc-pF | TATCCAGCCCTCACTCCTT                                                                      | ChIP-PCR    |
| 0.4-0.8kb pR             | AGTCGCCTGGCTCCTAA                                                                        | ChIP-PCR    |
| 0.8-1.2kb pR             | GGCTGAATCTTCCACCTACTT                                                                    | ChIP-PCR    |
| 1.2-1.6kb pR             | TCTGGGACGCAACCTCT                                                                        | ChIP-PCR    |
| 1.6-1.8kb pR             | CACTGCCTTACACAACCTCCTTG                                                                  | ChIP-PCR    |
| 1.8-2.3kb pR             | GACTTGTAGAGAGACAGGGTAGA                                                                  | ChIP-PCR    |
| 1.1-1.7kb-luc F          | TACTCGAGGGATGGAAGTGCAGTTAGGG                                                             | cloning     |
| 1.1-1.7kb-luc R          | CGCAAGCTTGCCTTCGGATACTGCTTCCT                                                            | cloning     |
| 1.7-2.5kb-luc F          | CGCCTCGAGCGACCATTTCTGACAACGC                                                             | cloning     |
| 1.7-2.5kb-lucR           | ACTAAGCTTCCTTCTTCGGCTGTGAAGAG                                                            | cloning     |
| 1.1-2.5kb-luc F          | TACTCGAGGGATGGAAGTGCAGTTAGGG                                                             | cloning     |
| 1.1-2.5kb -lucR          | ACTAAGCTTCCTTCTTCGGCTGTGAAGAG                                                            | cloning     |
| EZH2 WT F                | ATGGGCCAGACTGGGAAGAAATC                                                                  | cloning     |
| EZH2 WT R                | TCAAGCGTAATCTGGAACATCGTATGGGTAAAGCGT<br>AATCTGGAACATCGTATGGGTAAAGGGATTTCCATT<br>TCTCTTTC | cloning     |
| siEZH2 (CDS)             | AAGAGGUUCAGACGAGCTGAU                                                                    | knockdown   |
| siEZH2-5'UTR             | CGGTGGGACTCAGAAGGCATT                                                                    | knockdown   |
| shEZH2                   | CCGGGCTAGGTTAATTGGGACCAAACCTCGAGTTTG<br>GTCCCAATTAACCTAGCTTTTTG                          | knockdown   |
| shSUZ12                  | AAGCTGTTACCAAGCTCCGT                                                                     | knockdown   |
| shAR                     | CCCAAGATCCTTTCTGGGA                                                                      | knockdown   |
| 0.4-0.8kb F              | cgcatatctCCGAGTTTGCAGAGAGGTAAC                                                           | Cloning     |
| 0.4-0.8kb R              | cgcgatccAAACAAAATCCTCCACCTTCC                                                            | Cloning     |
| 0.8-1.2kb F              | cgcatatctGAGACAGACTGTGAGCCTAG                                                            | Cloning     |
| 0.8-1.2kb R              | cgcgatccGGAACAGATTCTGGAAAGCTC                                                            | Cloning     |
| 1.2-1.6kb F              | cgcatatctTTCCAGAATCTGTTCCAGAG                                                            | Cloning     |
| 1.2-1.6kb R              | cgcgatccCAGGATGTCTTTAAGGTCAG                                                             | Cloning     |
| 1.6-1.8kb F              | cgcatatctCTGACCTTAA AGACATCTG                                                            | Cloning     |
| 1.6-1.8kb R              | cgcgatccCACTGCCTTACACAACCTCCTTG                                                          | Cloning     |
| 1.8-2.3kb F              | cgcatatctCAAGGAGTTGTGTAAGGCAGTG                                                          | Cloning     |
| 1.8-2.3kb R              | cgcgatccAGAGAGTGTGCCAGGATGAG                                                             | Cloning     |
| EZH2 H689A F             | GTTTGGATTTACCGAAGCATTTGCAAACGAATTT<br>TGTTACCCTTGCG                                      | Mutagenesis |
| EZH2 H689A R             | CGCAAGGGTAACAAAATTCGTTTTGCAAATGCTTC<br>GGTAAATCCAAAC                                     | Mutagenesis |
| sgRNA1-F                 | GCGGGGTAAGGGAAGTAGGG                                                                     | CRISPR      |

|           |                         |                                       |
|-----------|-------------------------|---------------------------------------|
| sgRAN1-R  | CCCTACTTCCCTTACCCCGC    | CRISPR                                |
| sgRNA2-F  | GCCGCCGTGGCCGCCAGCAA    | CRISPR                                |
| sgRNA2-R  | TTGCTGGCGGCCACGGCGGC    | CRISPR                                |
| sgRNA3-F  | GCCCCCTAAGTAATTGTCCTTGG | CRISPR                                |
| sgRNA3-R  | CCAAGGACAATTACTTAGGGGGC | CRISPR                                |
| sgRNA4-F  | AGTTGTAGTAGTCGCGACTCTGG | CRISPR                                |
| sgRNA4-R  | CCAGAGTCGCGACTACTACAAC  | CRISPR                                |
| sgRNA5-F  | TGCATGTACGCCCCACTTTTGGG | CRISPR                                |
| SgRNA5-R  | CCCAAAGTGGGGCGTACATGCA  | CRISPR                                |
| Primer-F2 | CGCAAGTTTCCTTCTCTGGA    | CRISPR/Cas<br>9 DNA PCR<br>and RT-PCR |
| Primer-R2 | TCCCCTTCTCTTGCTCAGAA    | CRISPR/Cas<br>9 DNA PCR<br>and RT-PCR |
